# Supplementary material for: Biomaterial screening of protein coatings and peptide additives: towards a simple synthetic mimic of a complex natural coating for a bio-artificial kidney
Source: Royal Society of Chemistry journal article supplement (doi:10.1039/d0bm01930e), 2021-01-01
Supplement: d0bm01930e1.pdf [file d0bm01930e1.pdf]

## Supporting Information

### **Biomaterial screening of protein coatings and peptide additives: towards a simple synthetic mimic of a complex natural coating for a bio-artificial kidney**

*Ronald C. van Gaal, Annika F. Vreken, Johnick F. van Sprang, Peter-Paul K.H. Fransen, Mark C. van Turnhout, Patricia Y.W. Dankers*

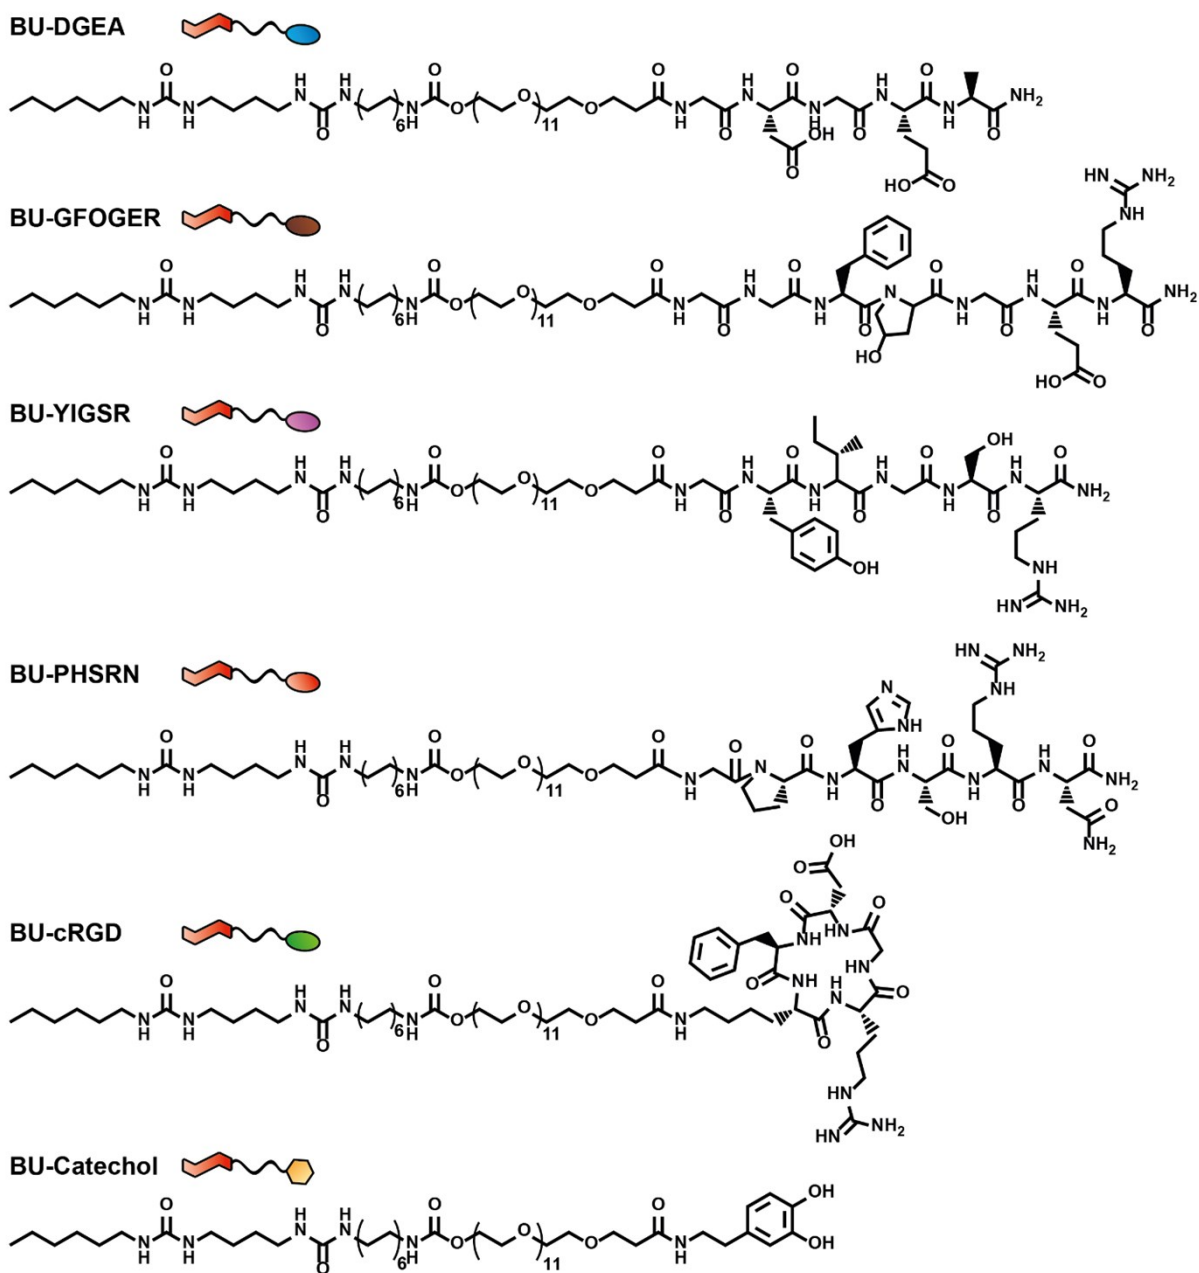

**Scheme S1. Chemical structures and schematic representations of BU-additives.**

**Table S1. ECM Library composition.** “+” present, “-” absent in coating combination, \*Not required for DoE analysis, performed as control. Sole presence of PCL-BU is termed Pristine.

| Run | Collagen type IV | Laminin | Fibronectin | Collagen type I | L-DOPA |
|-----|------------------|---------|-------------|-----------------|--------|
| 1   | -                | -       | -           | -               | +      |
| 2   | +                | -       | -           | -               | -      |
| 3   | -                | +       | -           | -               | -      |
| 4   | +                | +       | -           | -               | +      |
| 5   | -                | -       | +           | -               | -      |
| 6   | +                | -       | +           | -               | +      |
| 7   | -                | +       | +           | -               | +      |
| 8   | +                | +       | +           | -               | -      |
| 9   | -                | -       | -           | +               | -      |
| 10  | +                | -       | -           | +               | +      |
| 11  | -                | +       | -           | +               | +      |
| 12  | +                | +       | -           | +               | -      |
| 13  | -                | -       | +           | +               | +      |
| 14  | +                | -       | +           | +               | -      |
| 15  | -                | +       | +           | +               | -      |
| 16  | +                | +       | +           | +               | +      |
| 17* | -                | -       | -           | -               | -      |

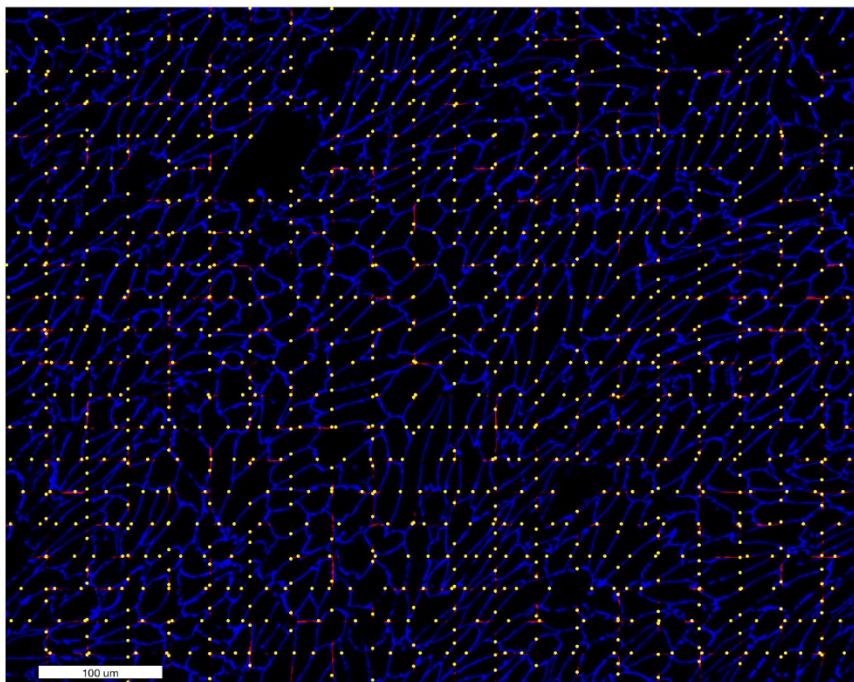

**Fig. S1** Example of quantification method ZO-1 intersections.

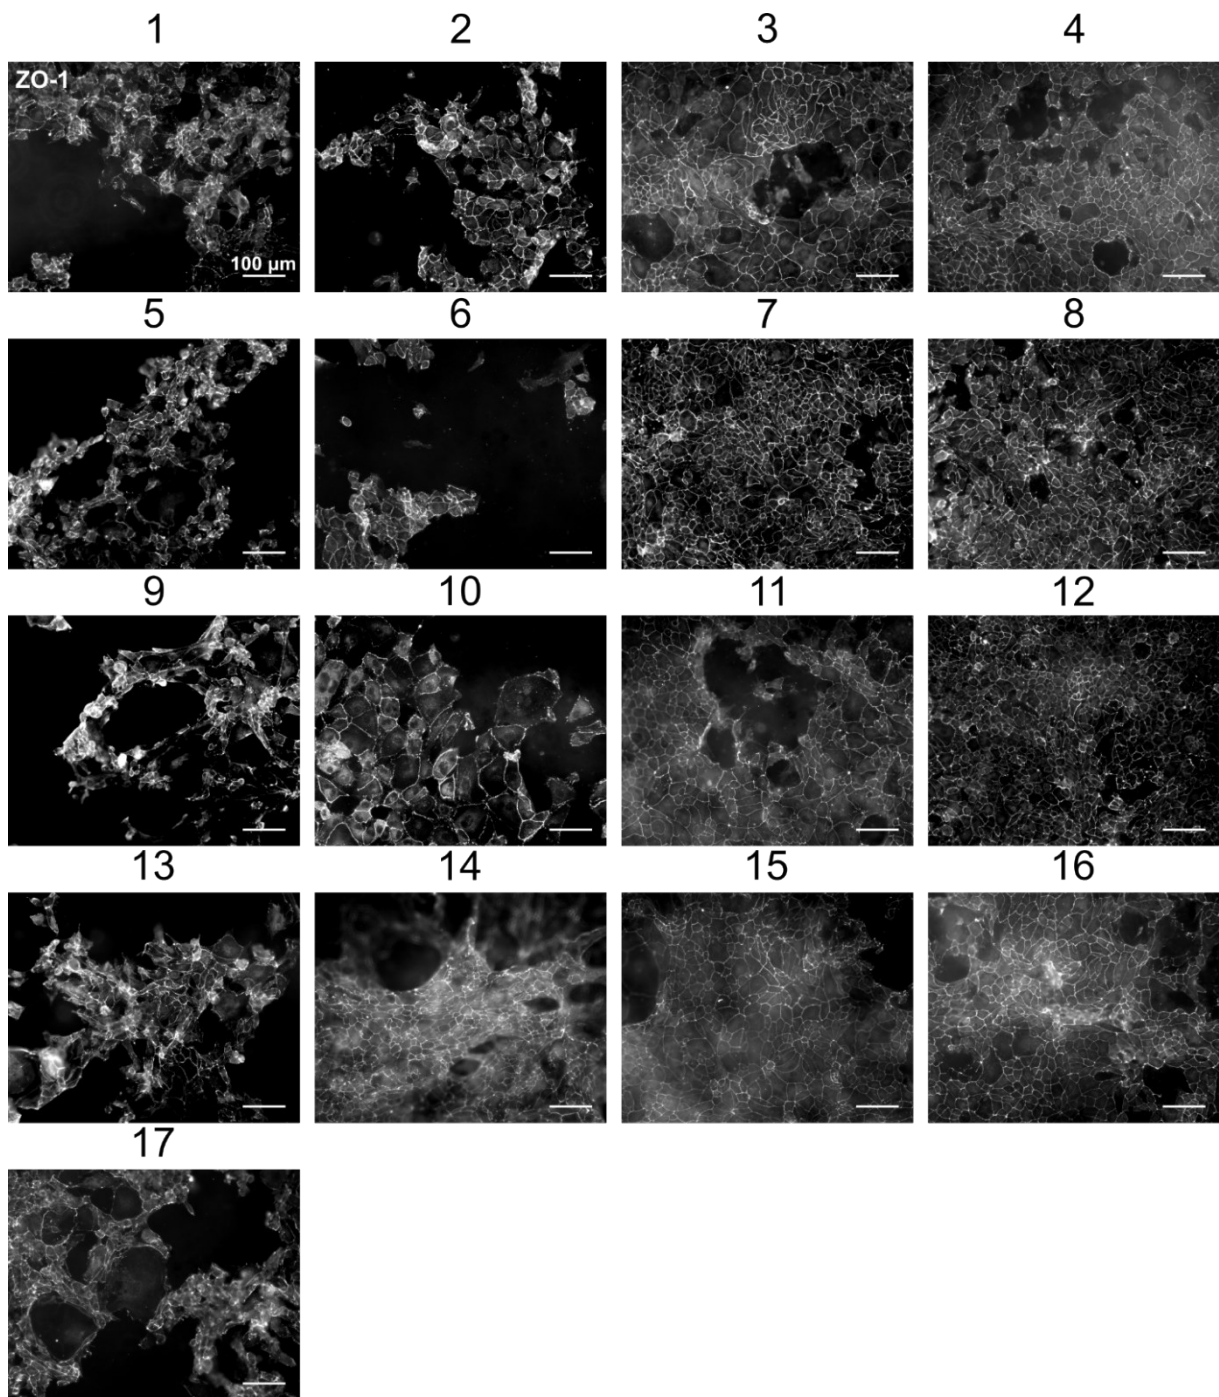

**Fig. S2 Response of HK-2 to all ECM library conditions.** HK-2 cells cultured for 3 weeks on biomaterial conditions listed in Table S1. Representative images of cells stained for Zona Occludens-1 (ZO-1), scale bar is 100  $\mu$ m, n=9.

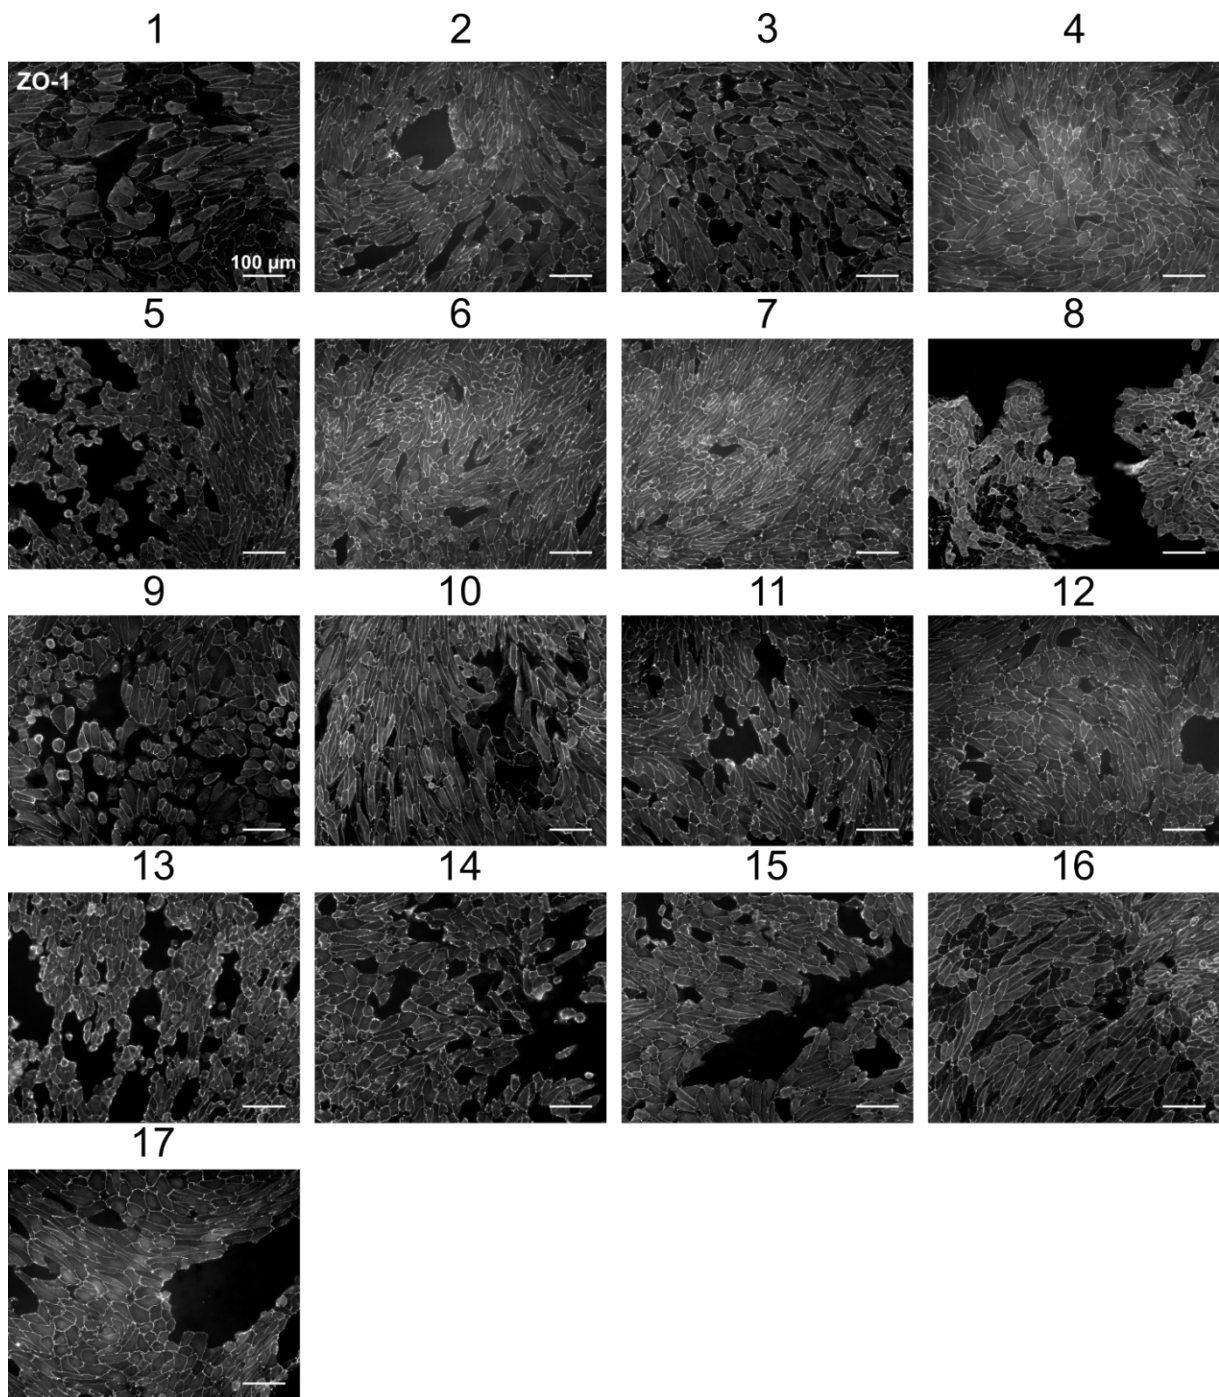

**Fig. S3 Response of RPTEC to all ECM library conditions.** RPTEC cells cultured for 3 weeks on biomaterial conditions listed in Table S1. Representative images of cells stained for Zona Occludens-1 (ZO-1), scale bar is 100  $\mu\text{m}$ , n=9.

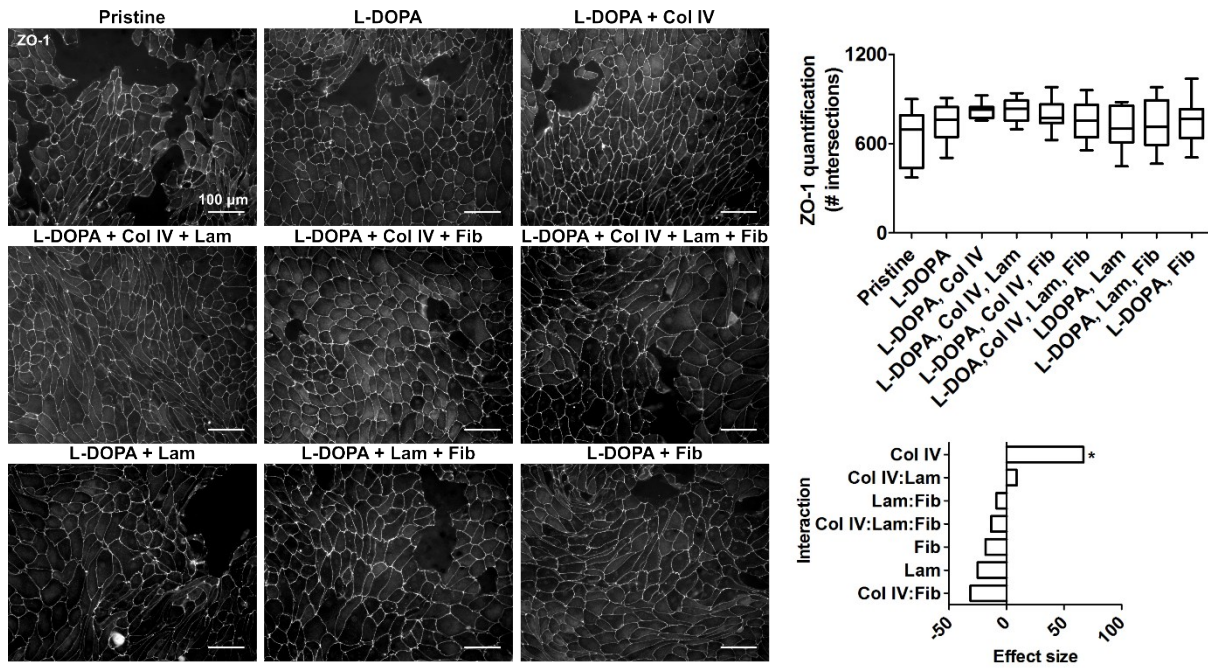

**Fig. S4 Response of RPTEC to ECM proteins with L-DOPA constant.** RPTEC cells cultured on biomaterial conditions coated with L-DOPA, Collagen type IV (Col IV), Laminin (Lam) or Fibronectin (Fib) or left pristine (no coating on PCL-BU) for 3 weeks. Representative images of cells stained for Zona Occludens-1 (ZO-1; Left), scale bar are 100 μm. Quantification of ZO-1 (Right top), effect size components (Right bottom),  $n=3$ ,  $*p\leq 0.05$ .

## Synthesis bis-urea additives

### *BU-(OEG)<sub>12</sub>-peptide*

All chemicals were purchased from Sigma-Aldrich unless otherwise stated. Fmoc-Gly-Asp(OtBu)-Gly-Glu(OtBu)-Ala (40 mg, 0.05 mmol), Fmoc-Gly-Pro-His(Trt)-Ser(tBu)-Arg(Pbf)-Asn(Trt) (96 mg, 0.05 mmol), Fmoc-Gly-Tyr(tBu)-Ile-Gly-Ser(tBu)-Arg(Pbf) (62 mg, 0.05 mmol), or Fmoc-Gly-Gly-Phe-Hyp(tBu)-Gly-Glu(OtBu)-Arg(Pbf) (55 mg, 0.05 mmol) on rink amide resin (0.66 mmol/g) was deprotected 2x15 min with a 20 v/v% piperidine in DMF mixture. BU-OEG<sub>12</sub>-COOH (108 mg; 0.1 mmol) was dissolved in 4 mL DMF. *N,N*-Diisopropylethylamine (44  $\mu$ l, 0.25 mmol) and HATU (38 mg, 0.1 mmol) were dissolved in 2 mL DMF, respectively, added to the BU-OEG<sub>12</sub>-COOH mixture, and stirred for 30 min. After pre-activation, the reaction mixture was added to peptides on resin and reacted overnight under shaking conditions at room temperature. The BU-OEG<sub>12</sub>-peptides were cleaved from the resin in a 95:2.5:2.5 v/v% TFA:TIS:H<sub>2</sub>O mixture. The cleavage mixture was precipitated three times in ice-cold Et<sub>2</sub>O. The precipitate was collected, dissolved in a mixture of water/acetonitrile, and freeze-dried yielding 58 mg BU-OEG<sub>12</sub>-GDGEA (76 %), 49 mg BU-OEG<sub>12</sub>-GPHSRN (52%), 37 mg BU-OEG<sub>12</sub>-GYIGSR (43%), and 53 mg BU-OEG<sub>12</sub>-GGFOGER (58 %) as fluffy white solids. BU-OEG<sub>12</sub>-GDGEA: LC-MS(ESI)  $t_r$  = 6.10 min,  $m/z$  calcd (C<sub>68</sub>H<sub>127</sub>N<sub>11</sub>O<sub>26</sub>) 1513.90; found 505.67 [M+3H]<sup>3+</sup>, 758.00 [M+2H]<sup>2+</sup>, 1514.67 [M+H]<sup>+</sup>. BU-OEG<sub>12</sub>-GPHSRN: LC-MS(ESI)  $t_r$  = 4.36 min,  $m/z$  calcd (C<sub>78</sub>H<sub>144</sub>N<sub>18</sub>O<sub>25</sub>) 1733.06; found 434.42 [M+4H]<sup>4+</sup>, 578.92 [M+3H]<sup>3+</sup>, 867.58 [M+2H]<sup>2+</sup>, 1733.06 [M+H]<sup>+</sup>. BU-OEG<sub>12</sub>-GYIGSR: LC-MS(ESI)  $t_r$  = 4.65 min,  $m/z$  calcd (C<sub>80</sub>H<sub>147</sub>N<sub>15</sub>O<sub>25</sub>) 1718.07; found 573.92 [M+3H]<sup>3+</sup>, 860.42 [M+2H]<sup>2+</sup>, 1718.92 [M+H]<sup>+</sup>. BU-OEG<sub>12</sub>-GGFOGER: LC-MS(ESI)  $t_r$  = 4.65 min,  $m/z$  calcd (C<sub>83</sub>H<sub>148</sub>N<sub>16</sub>O<sub>27</sub>) 1801.07; found 473.33 [M+4Na]<sup>4+</sup>, 601.58 [M+3H]<sup>3+</sup>, 901.58 [M+2H]<sup>2+</sup>, 1802.92 [M+H]<sup>+</sup>.

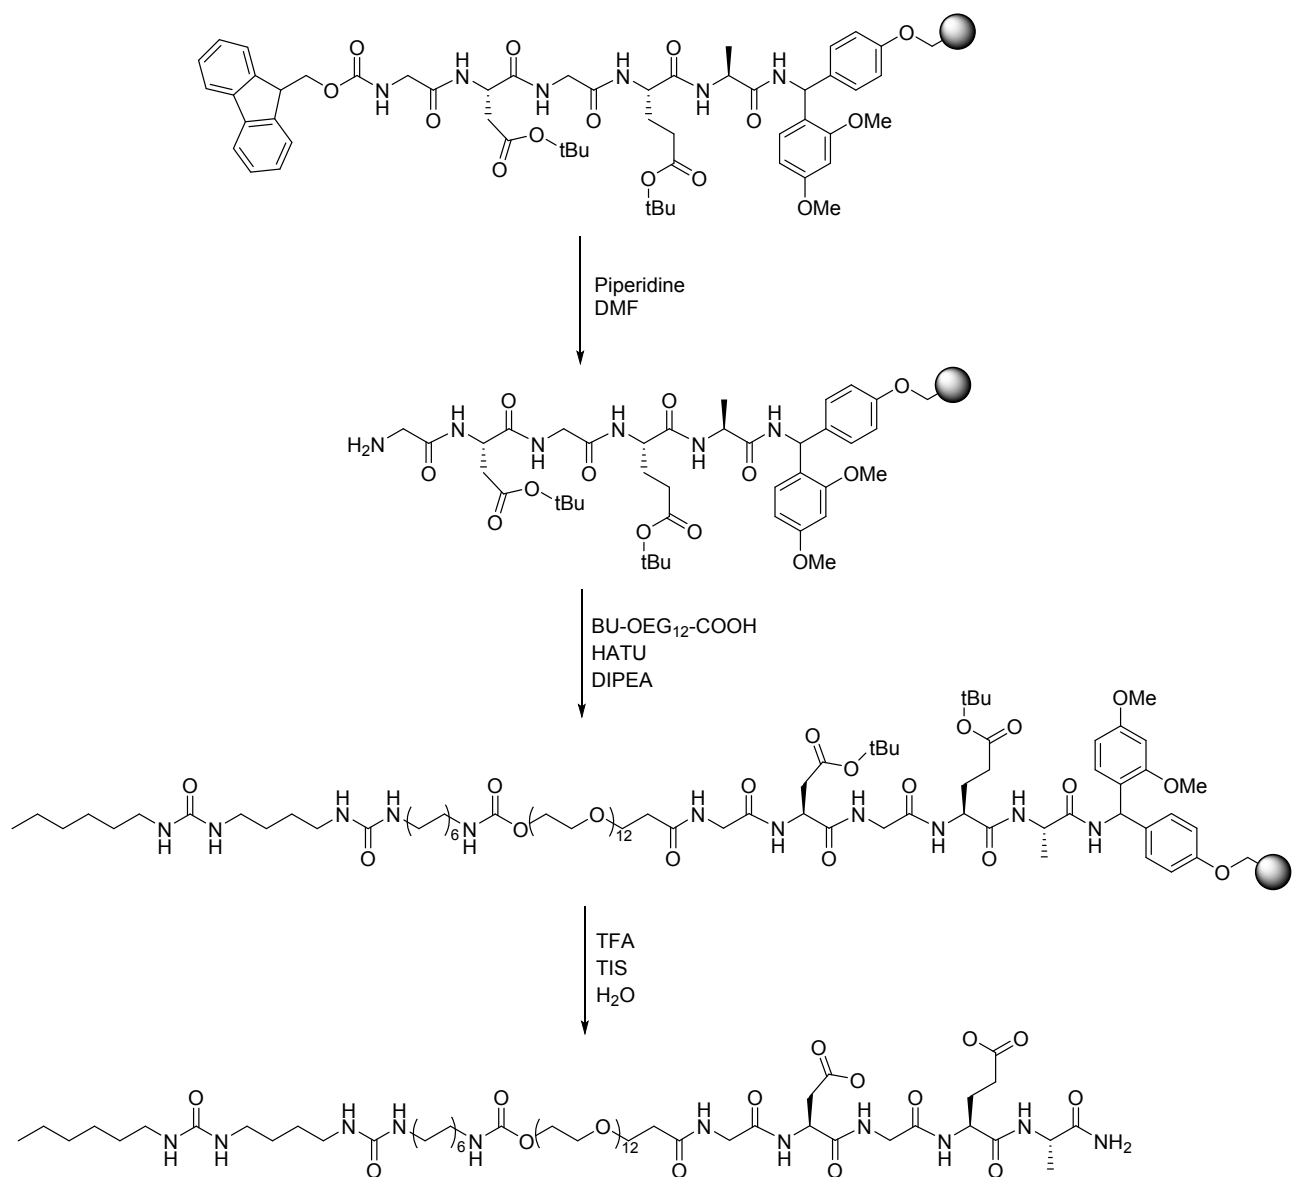

**Scheme S2 Synthesis of BU-DGEA.**



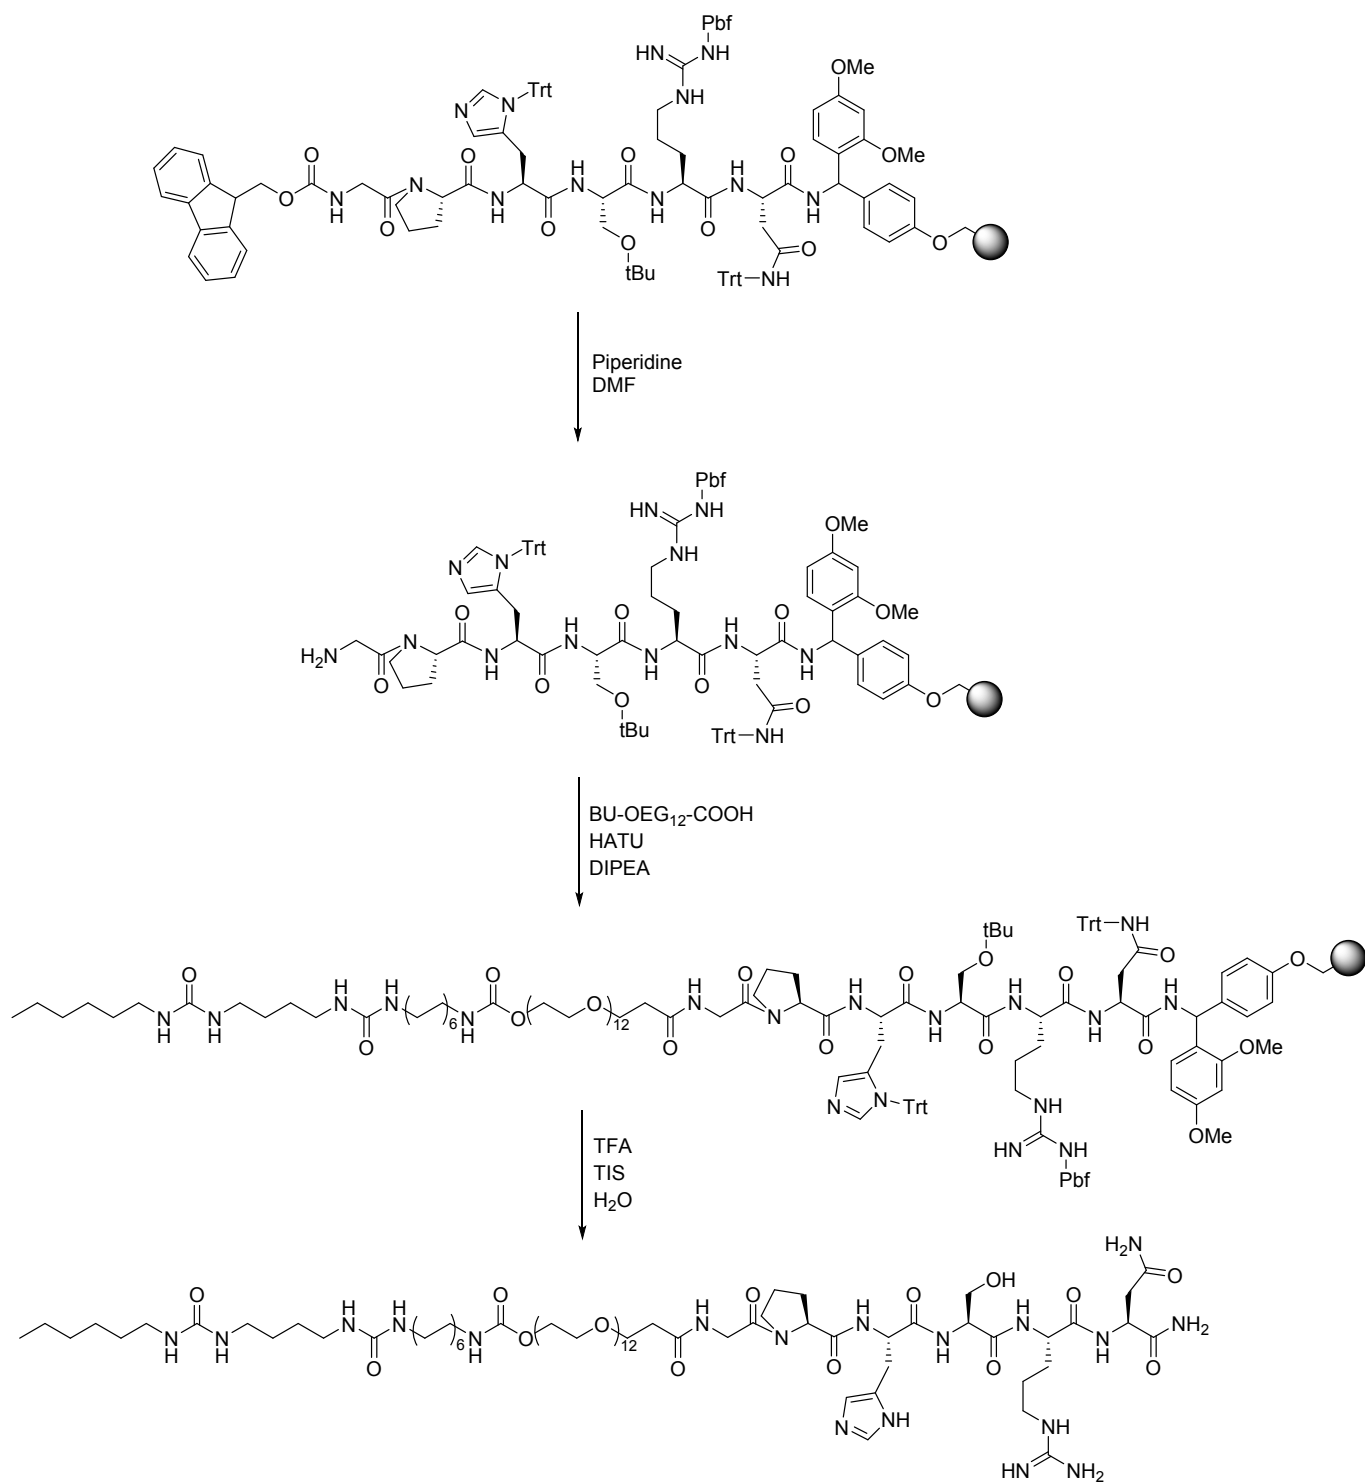

**Scheme S3 Synthesis of BU-PHSRN.**

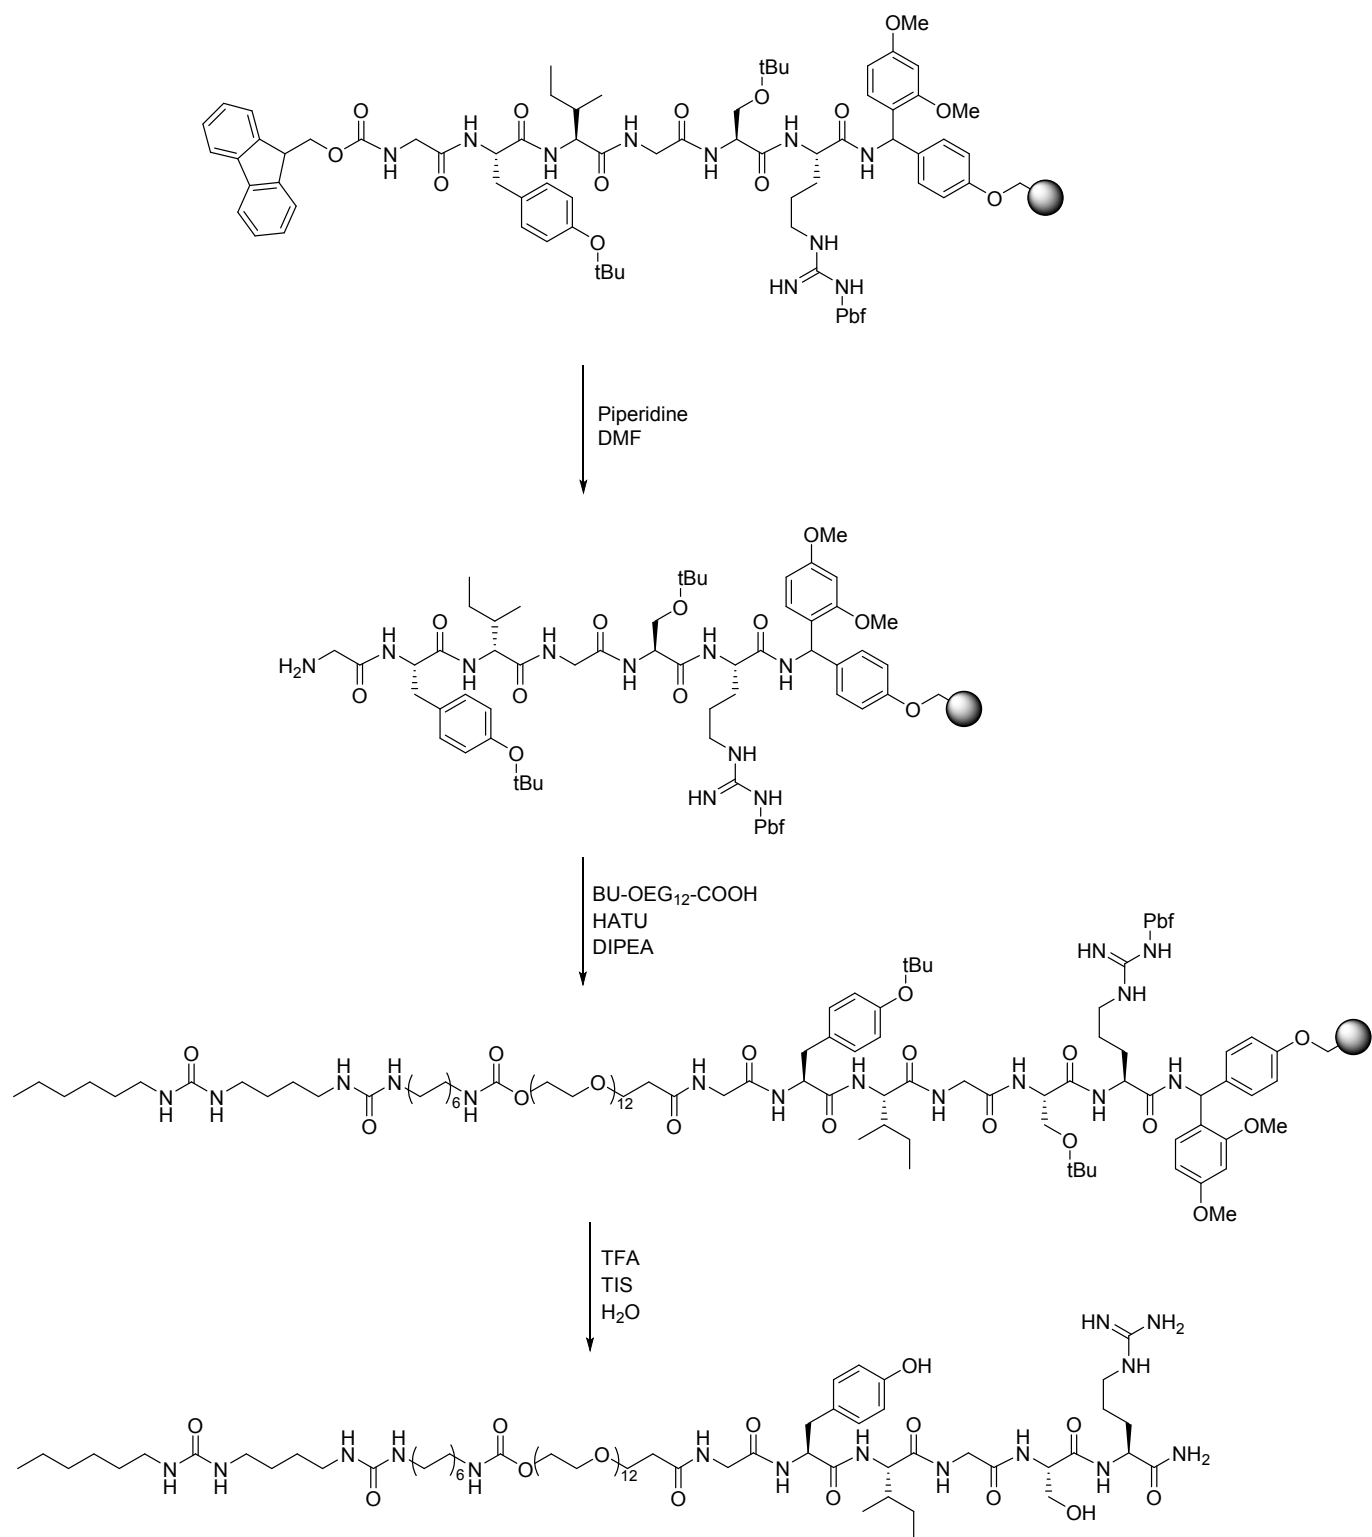

**Scheme S4** Synthesis of BU-YIGSR.

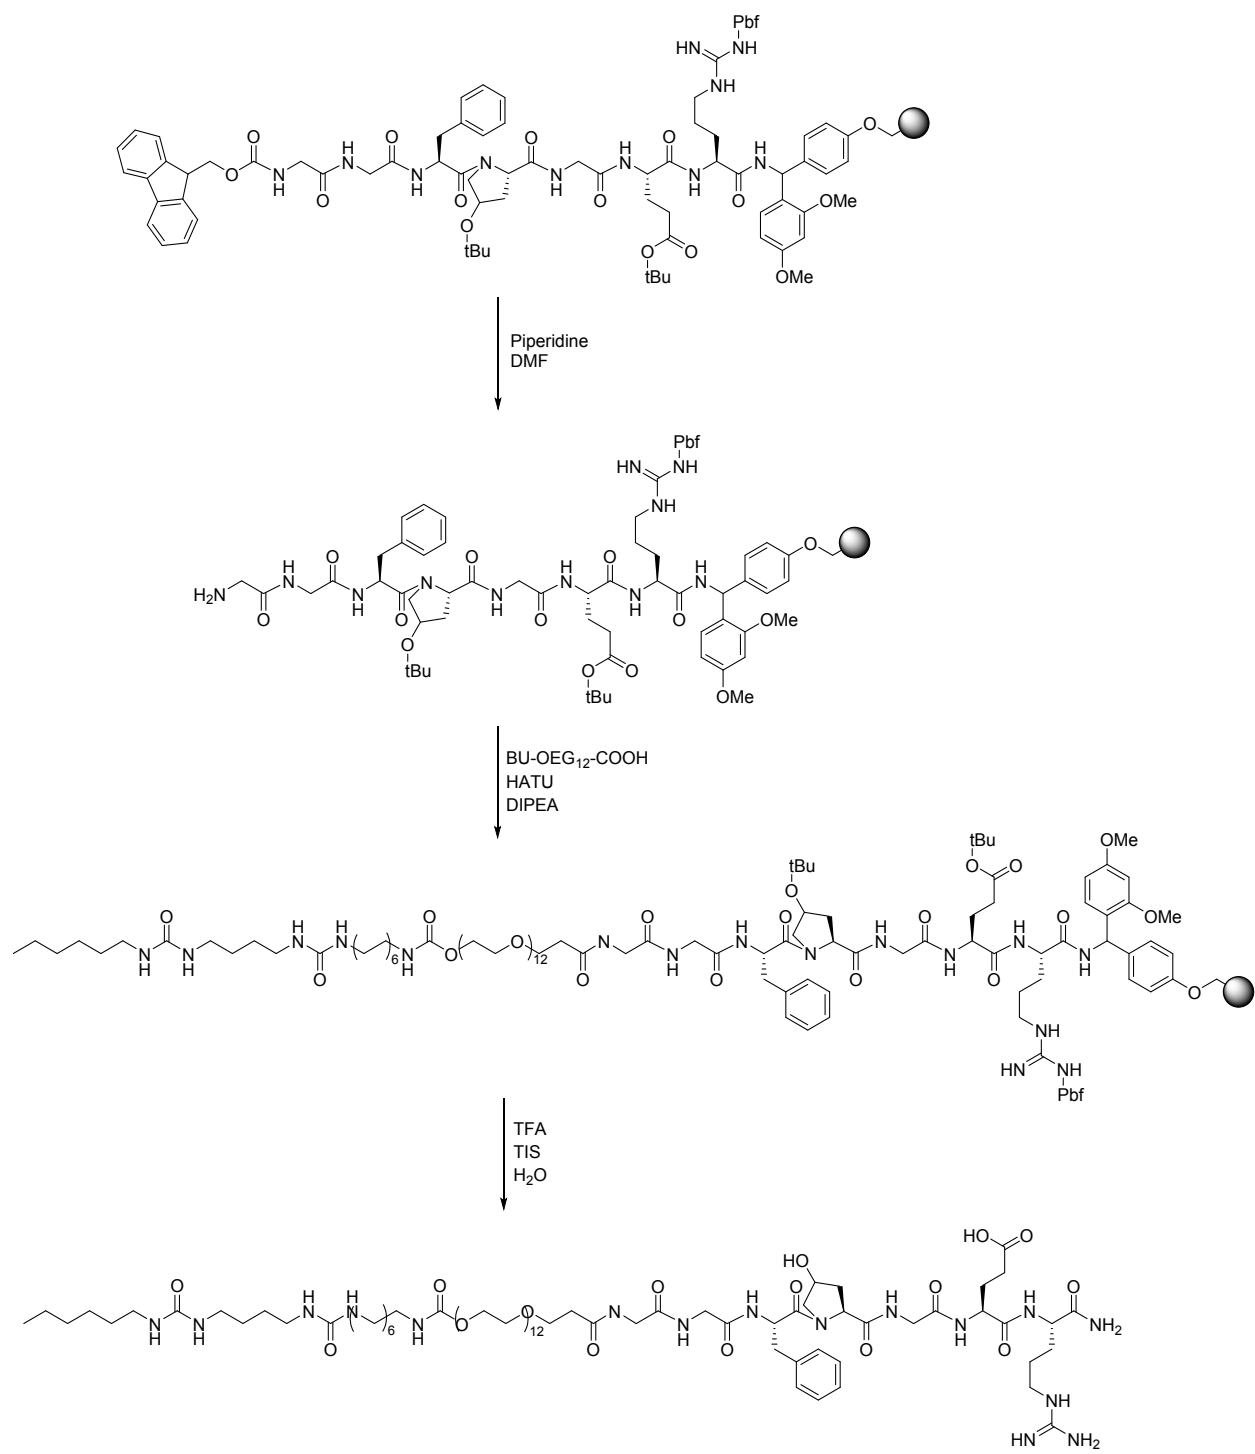

**Scheme S5 Synthesis of BU-GFOGER.**

### BU-(OEG)<sub>12</sub>-Catechol

BU-OEG<sub>12</sub>-COOH (100 mg; 0.09 mmol; SyMO-Chem) was dissolved in 4 mL DMF under argon. *N*-methylmorpholine (60  $\mu$ l, 0.54 mmol) and HATU (50 mg, 0.14 mmol) were added to the reaction mixture and stirred for 30 min. After pre-activation, 3,4-dihydroxyphenethylamine hydrochloride (26 mg, 0.14 mmol) was added and the reaction was stirred overnight under argon. The reaction mixture was precipitated three times in a 1% (v/v) solution of formic acid in water. The precipitate was collected, dissolved in mixture of water/acetonitrile and freeze-dried yielding 92 mg (84%) of the product as a fluffy white solid.

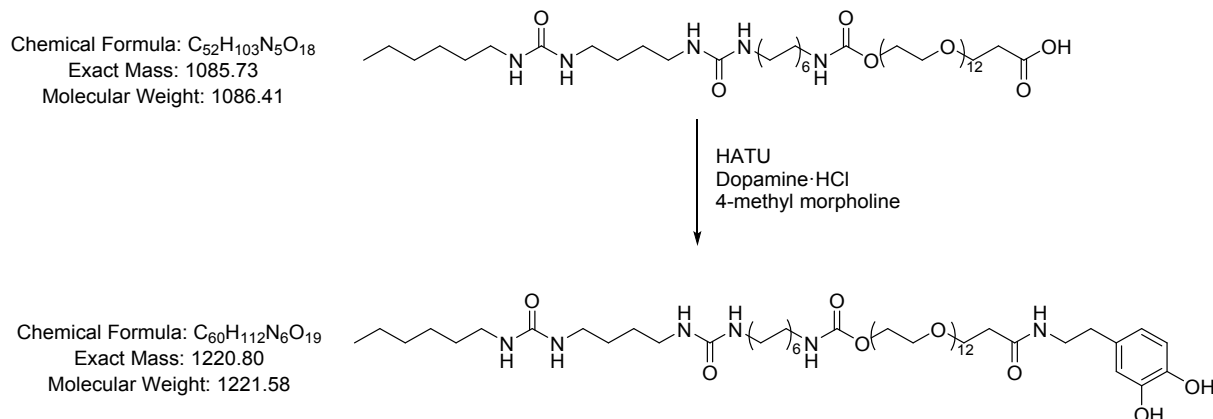

### Scheme S6 Synthesis of BU-Catechol.

<sup>1</sup>H NMR (400 MHz, DMSO)  $\delta$  = 8.72 (bs, 1H), 8.63 (bs, 1H), 7.84 (NH), 7.16 (NH), 6.61 (d, *J* = 8.0 Hz, 1H), 6.56 (d, *J* = 2.0 Hz, 1H), 6.43 (dd, *J* = 8.0, 2.1 Hz, 1H), 5.73 (NH), 4.02 (bs, 2H), 3.60-3.40 (m, 48H), 3.17 (m, 2H), 2.94 (m, 10H), 2.50 (m, 2H), 2.28 (t, *J* = 6.44 Hz, 2H), 1.40-1.20 (m, 32H), 0.86 (t, *J* = 6.79 Hz, 3H)

<sup>13</sup>C NMR (100 MHz, DMSO)  $\delta$  = 169.84, 158.08, 156.13, 145.03, 143.49, 130.20, 119.17, 115.92, 115.44, 69.78, 69.72, 69.67, 69.52, 68.91, 66.85, 62.98, 39.52, 36.17, 34.68, 31.07, 30.07, 30.03, 29.40, 29.09, 29.03, 28.85, 28.76, 27.61, 26.44, 26.26, 26.09, 22.11, 13.94.

LC-MS(ESI) *t<sub>r</sub>* = 5.29 min, *m/z* calcd (C<sub>60</sub>H<sub>112</sub>N<sub>6</sub>O<sub>19</sub>) 1220.80; found 611.42 [M+2H]<sup>2+</sup>, 1221.50 [M+H]<sup>+</sup>.

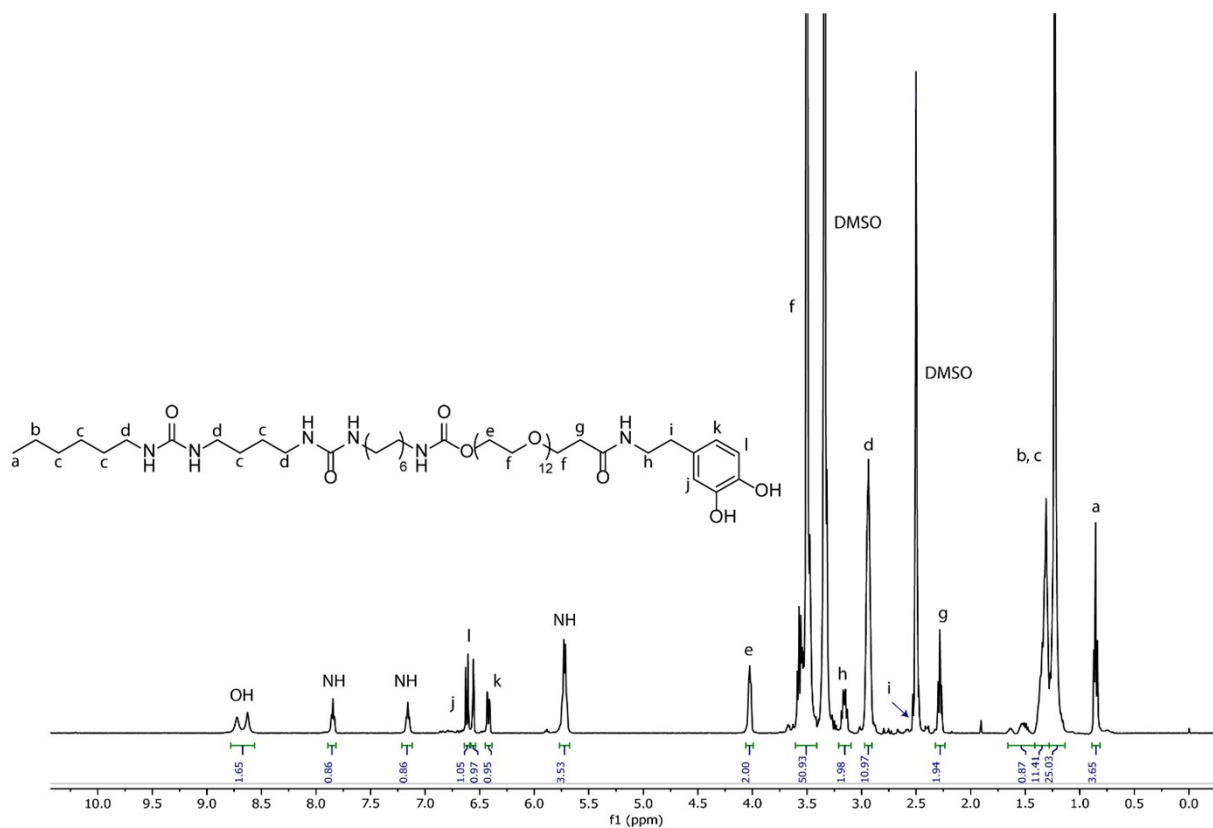

Fig. S5 <sup>1</sup>H-NMR spectrum of BU-Catechol.

**Table S2 BU-additive library composition.** “+” present, “-” absent in combination. Sole presence of PCL-BU is termed Pristine. 1 mol% per BU-peptide and/or 5 mol% per BU-catechol was/were employed.

| Run | BU-GFOGER | BU-YIGSR | BU-cRGD | BU-DGEA | BU-Catechol | BU-PHSRN |
|-----|-----------|----------|---------|---------|-------------|----------|
| 1   | -         | -        | -       | -       | -           | -        |
| 2   | +         | -        | -       | -       | -           | +        |
| 3   | -         | +        | -       | -       | -           | +        |
| 4   | +         | +        | -       | -       | -           | -        |
| 5   | -         | -        | +       | -       | -           | +        |
| 6   | +         | -        | +       | -       | -           | -        |
| 7   | -         | +        | +       | -       | -           | -        |
| 8   | +         | +        | +       | -       | -           | +        |
| 9   | -         | -        | -       | +       | -           | +        |
| 10  | +         | -        | -       | +       | -           | -        |
| 11  | -         | +        | -       | +       | -           | -        |
| 12  | +         | +        | -       | +       | -           | +        |
| 13  | -         | -        | +       | +       | -           | -        |
| 14  | +         | -        | +       | +       | -           | +        |
| 15  | -         | +        | +       | +       | -           | +        |
| 16  | +         | +        | +       | +       | -           | -        |
| 17  | -         | -        | -       | -       | +           | +        |
| 18  | +         | -        | -       | -       | +           | -        |
| 19  | -         | +        | -       | -       | +           | -        |
| 20  | +         | +        | -       | -       | +           | +        |
| 21  | -         | -        | +       | -       | +           | -        |
| 22  | +         | -        | +       | -       | +           | +        |
| 23  | -         | +        | +       | -       | +           | +        |
| 24  | +         | +        | +       | -       | +           | -        |
| 25  | -         | -        | -       | +       | +           | -        |
| 26  | +         | -        | -       | +       | +           | +        |
| 27  | -         | +        | -       | +       | +           | +        |
| 28  | +         | +        | -       | +       | +           | -        |
| 29  | -         | -        | +       | +       | +           | +        |
| 30  | +         | -        | +       | +       | +           | -        |
| 31  | -         | +        | +       | +       | +           | -        |
| 32  | +         | +        | +       | +       | +           | +        |

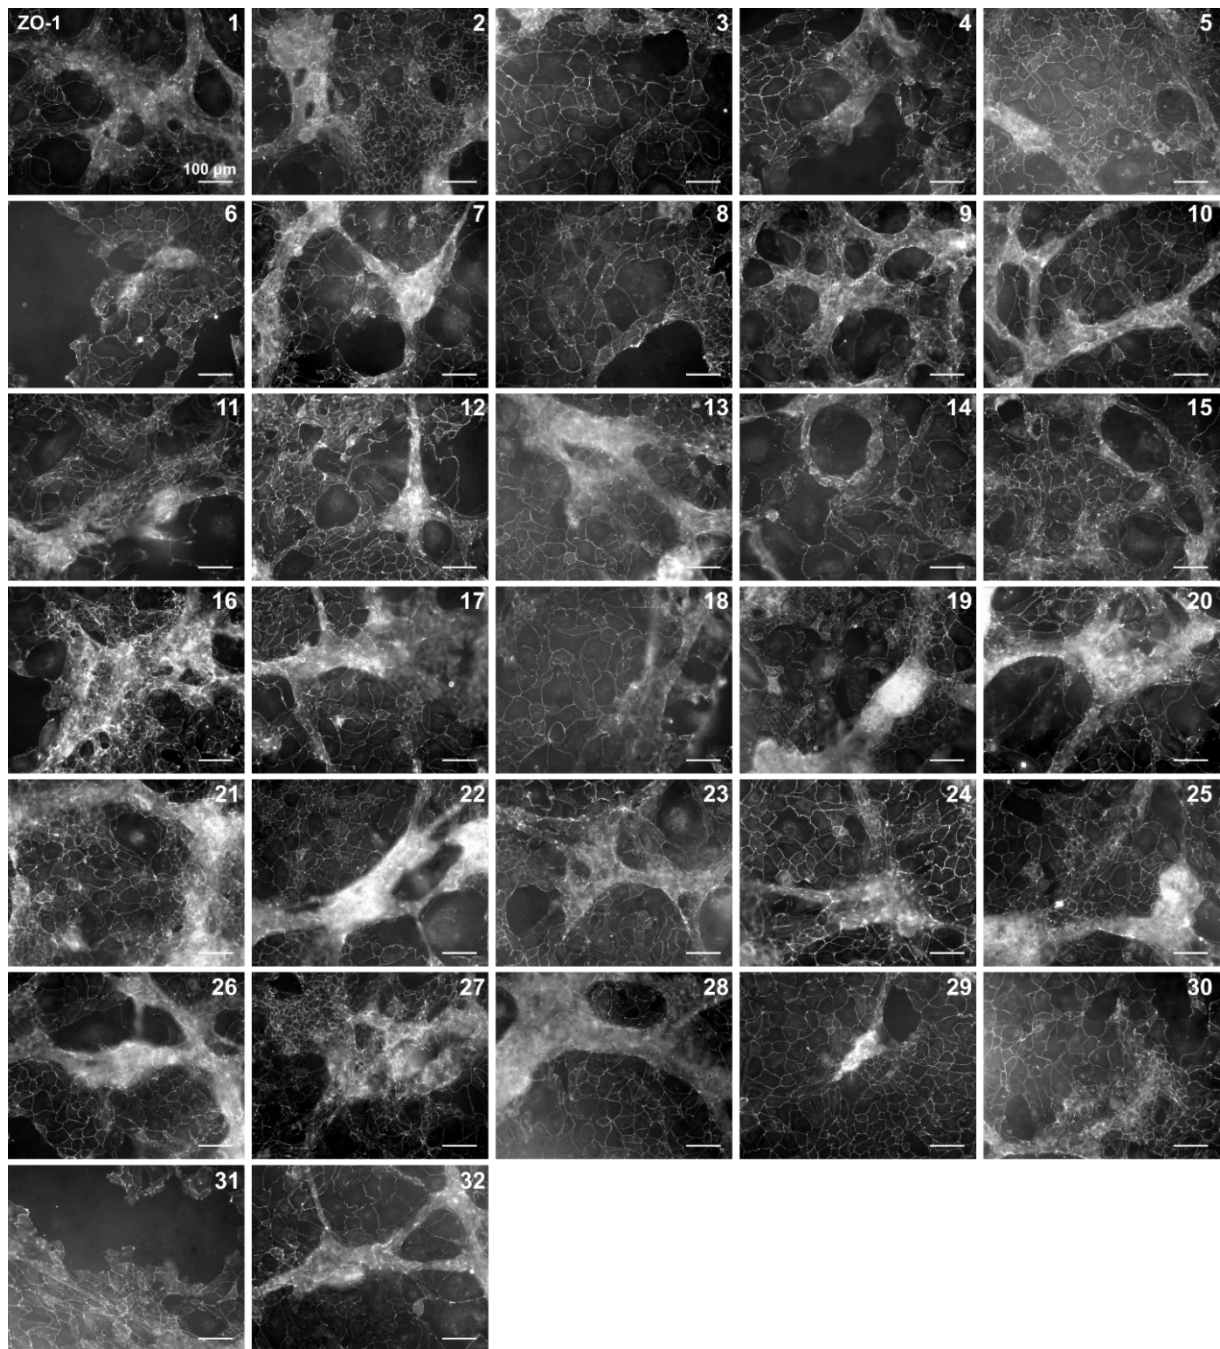

**Fig. S6 HK-2 response to all BU-additive library conditions.** HK-2 cells cultured for 3 weeks on biomaterial conditions listed in Table S2. Representative images of cells stained for ZO-1, scale bar is 100  $\mu\text{m}$ , n=6.

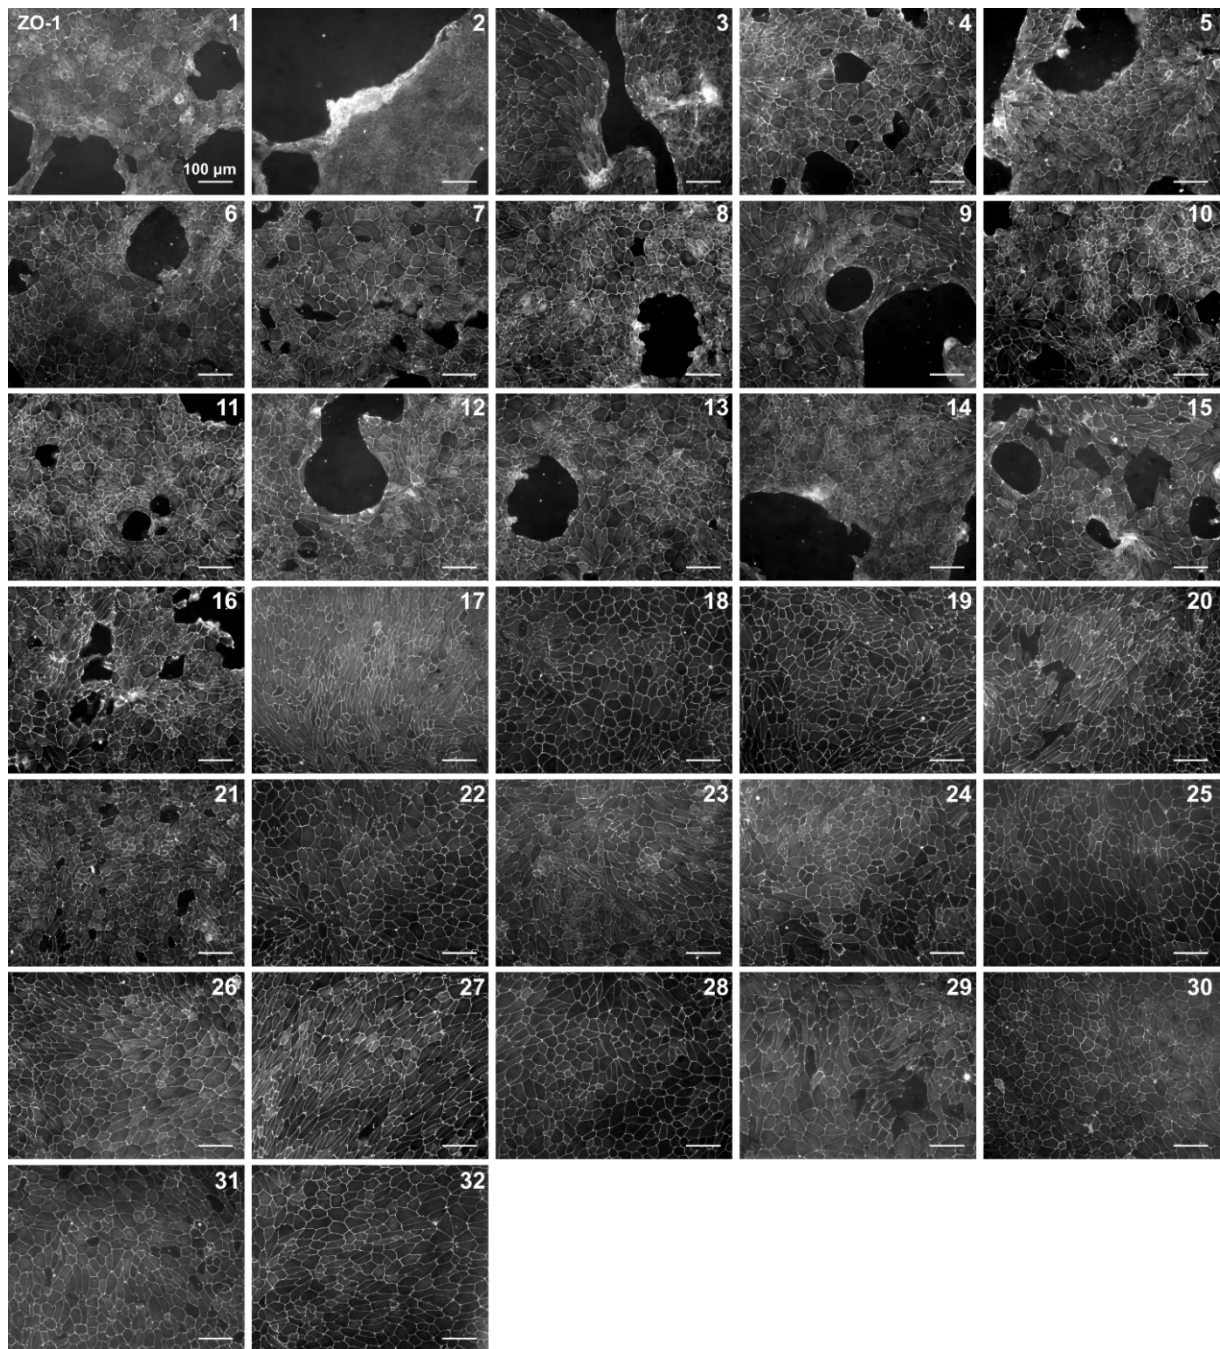

**Fig. S7 RPTEC response to all BU-additive library conditions.** RPTEC cells cultured for 3 weeks on biomaterial conditions listed in Table S2. Representative images of cells stained for Zona Occludens-1 (ZO-1), scale bar is 100  $\mu\text{m}$ , n=6.



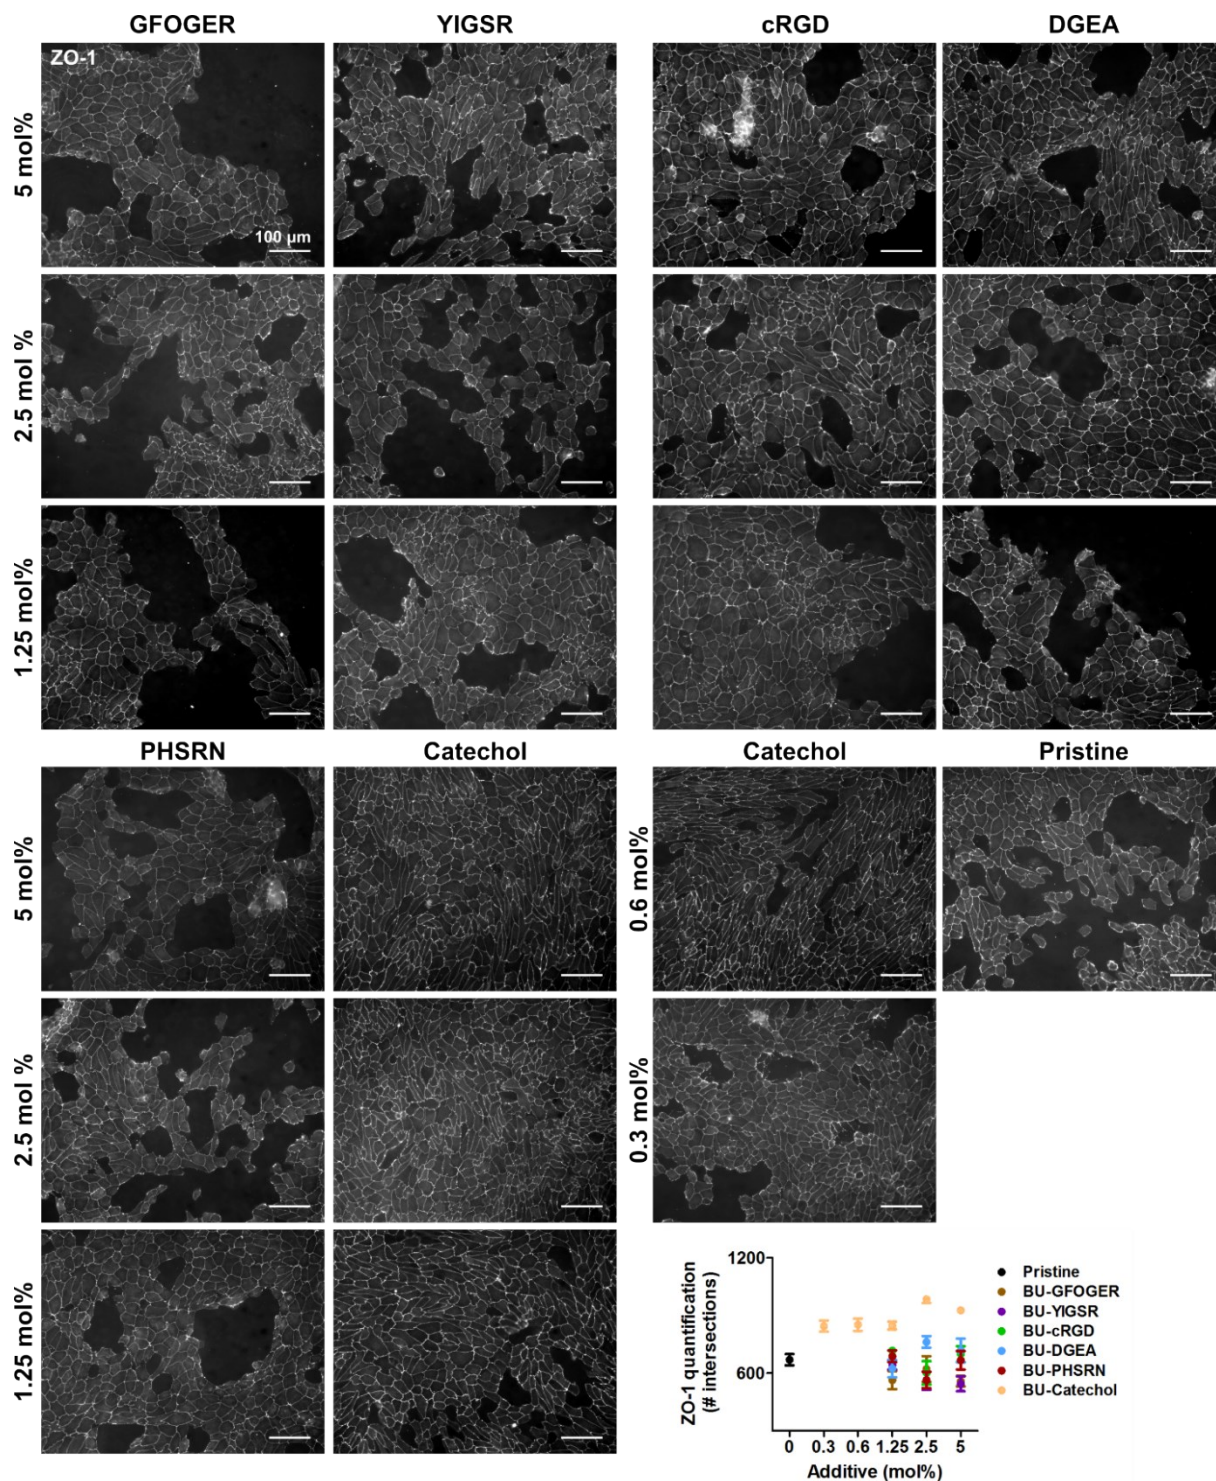

**Fig. S8 Concentration range of BU-additives.** RPTEC cells cultured for 3 weeks on biomaterials containing different concentrations of BU-additives. Representative images of cells stained for Zona Occludens-1 (ZO-1), and subsequently quantified, n=3.

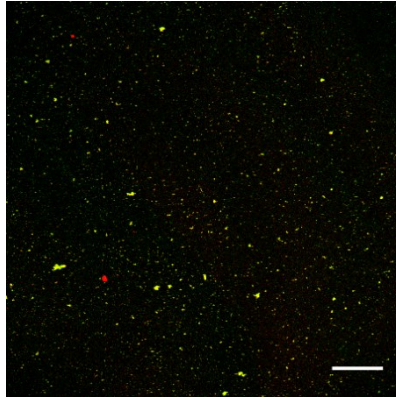

**Fig. S9 Staining of L-DOPA with Collagen type IV and Laminin coating before cell culture.** Laminin (green), Collagen type IV (red), scale bar is 100  $\mu\text{m}$ .

**Table S3. List of employed antibodies.**

| Antibody against              | Supplier, catalogue number | Dilution |
|-------------------------------|----------------------------|----------|
| ZO-1                          | BD Biosciences, 610966     | 1:200    |
| $\alpha$ Tubulin              | Abcam, ab18251             | 1:200    |
| Collagen type IV              | Abcam ab6586               | 1:100    |
| Laminin gamma 1               | Abcam, ab17792             | 1:50     |
| Megalin                       | Abcam, ab76969             | 1:200    |
| Phalloidin-atto4888           | Sigma-Aldrich, 49409       | 1:500    |
| anti-mouse IgG (H+L) - AF555  | Molecular probes, A21424   | 1:200    |
| anti-mouse IgG (H+L) - AF647  | Molecular probes, A21236   | 1:200    |
| anti-rabbit IgG (H+L) - AF555 | Molecular probes, A21428   | 1:200    |
| anti-rabbit IgG (H+L) - AF647 | Molecular probes, A21244   | 1:200    |
| anti-Rat IgG (H+L) - AF488    | Invitrogen, A11006         | 1:200    |
| anti-Rat IgG (H+L) - AF555    | Molecular Probes, A21434   | 1:200    |
